# Supplementary material for: Torsional disorder and planarization dynamics: 9,10-bis(phenylethynyl)anthracene as a case study
Source: Royal Society of Chemistry journal article supplement (doi:10.1039/d2cp03909e), 2022-01-01
Supplement: d2cp03909e1.pdf [file d2cp03909e1.pdf]

# Torsional disorder and planarisation dynamics: 9,10-bis(phenylethynyl)anthracene as a case study

Ina Fureraaj, Darya S. Budkina, Eric Vauthey\*

*Department of Physical Chemistry, University of Geneva, 30 Quai Ernest-Ansermet, 1211 Genève 4, Switzerland*

## Contents

|                                                                          |    |
|--------------------------------------------------------------------------|----|
| S1 Quantum-chemical calculations                                         | 4  |
| S2 Stationary spectroscopy                                               | 7  |
| S3 Femtosecond broadband fluorescence up-conversion spectroscopy (FLUPS) | 8  |
| S4 Electronic transient absorption spectroscopy (TA)                     | 12 |

## List of Figures

|     |                                                                                                                                                                                                                                                                                                                                                                                                                                                                                                                    |    |
|-----|--------------------------------------------------------------------------------------------------------------------------------------------------------------------------------------------------------------------------------------------------------------------------------------------------------------------------------------------------------------------------------------------------------------------------------------------------------------------------------------------------------------------|----|
| S1  | Calculated (M06-2x/6-31G(d,p)) $S_1 \leftarrow S_0$ transition energy of <b>BPEA</b> as a function of the torsion angle $\theta$ . . . . .                                                                                                                                                                                                                                                                                                                                                                         | 4  |
| S2  | Calculated (M06-2x/6-31G(d,p)) oscillator strength of the $S_1 \leftarrow S_0$ transition of <b>BPEA</b> as a function of the torsion angle $\theta$ . . . . .                                                                                                                                                                                                                                                                                                                                                     | 5  |
| S3  | Boltzmann distribution of torsion angle, $\theta$ , of <b>BPEA</b> in the ground state at two temperatures. . . . .                                                                                                                                                                                                                                                                                                                                                                                                | 5  |
| S4  | Thermal distribution of the $S_1 \leftarrow S_0$ transition energy of <b>BPEA</b> at room temperature and best fit of eq.(1). . . . .                                                                                                                                                                                                                                                                                                                                                                              | 6  |
| S5  | Temperature dependence of the stationary absorption spectrum of <b>BPEA</b> in Zeonex. . . . .                                                                                                                                                                                                                                                                                                                                                                                                                     | 7  |
| S6  | Temperature dependence of the fluorescence spectrum of <b>BPEA</b> in Zeonex upon 430 nm excitation. The 123 K spectrum was cut above $20\,500\text{ cm}^{-1}$ because of the presence of scattered light. . . . .                                                                                                                                                                                                                                                                                                 | 7  |
| S7  | Evolution-associated spectra obtained from a global analysis of the FLUPS data measured with <b>BPEA</b> in cyclohexane upon 425 nm excitation assuming a $A \rightarrow B \rightarrow C \rightarrow D \rightarrow$ scheme. . . . .                                                                                                                                                                                                                                                                                | 8  |
| S8  | Transient fluorescence spectra recorded at various time delays after 375 (top) and 400 nm (bottom) excitation of <b>BPEA</b> in cyclohexane. The blue side of early spectra upon 400 nm excitation are cut due to the presence of Raman scattering. . . . .                                                                                                                                                                                                                                                        | 9  |
| S9  | Evolution-associated spectra obtained from a global analysis of the FLUPS data measured with <b>BPEA</b> in decaline (top) and paraffin oil (bottom) upon 425 nm excitation assuming a $A \rightarrow B \rightarrow C \rightarrow D \rightarrow$ scheme. . . . .                                                                                                                                                                                                                                                   | 10 |
| S10 | Amplitude-averaged time constant obtained from a (multi)-exponential analysis of the time evolution of $\beta$ (Figure 6B) vs. viscosity and best fit of eq.(2). . . . .                                                                                                                                                                                                                                                                                                                                           | 11 |
| S11 | Transient electronic absorption spectra recorded at various time delays after 400, 450, and 470 nm excitation of <b>BPEA</b> in decaline. . . . .                                                                                                                                                                                                                                                                                                                                                                  | 12 |
| S12 | Transient electronic absorption spectra recorded at various time delays after 400 nm (top), and 470 nm (bottom) excitation of <b>BPEA</b> in paraffin oil. . . . .                                                                                                                                                                                                                                                                                                                                                 | 13 |
| S13 | Transient electronic absorption spectra recorded at early (A) and late time (B) after 470 nm excitation of <b>BPEA</b> in cyclohexane, negative stationary absorption and stimulated emission spectra of <b>BPEA</b> in MTHF at 123 K (A) and cyclohexane at 298 K (B) and linear combinations of the absorption and stimulated emission spectra. The stimulated emission spectra were calculated by multiplying the spontaneous emission spectra by $\lambda^4$ , where $\lambda$ is the wavelength.[1] . . . . . | 14 |
| S14 | Time profiles of the 440 nm transient band area measured upon 470 nm excitation of <b>BPEA</b> and best biexponential fits. The initial spike is associated with vibrational coherence and was not included in the fit. Inset: amplitude-averaged time constant vs. viscosity and best fit of eq.2. (CHX: cyclohexane; DEC: decaline; PAR: paraffin oil). . . . .                                                                                                                                                  | 15 |
| S15 | Transient electronic absorption spectra recorded upon 400 nm (top) and 470 nm (bottom) excitation of <b>BPEA</b> in Zeonex. . . . .                                                                                                                                                                                                                                                                                                                                                                                | 16 |

## List of Tables

|    |                                                                                                                                                                                                                 |    |
|----|-----------------------------------------------------------------------------------------------------------------------------------------------------------------------------------------------------------------|----|
| S1 | $S_1(v=0) \leftarrow S_0(v=0)$ transition energy of <b>BPEA</b> in the gas phase obtained from TD-DFT calculations with different functionals and the 6-31G(d,p) basis set. . . . .                             | 4  |
| S2 | Time constants, $\tau_i$ , and relative amplitudes, $A_i$ , obtained from a multiexponential analysis of the rise of the fluorescence band area (Figure 5, main text). Error on $\tau_i$ : $\pm 10\%$ . . . . . | 11 |

## S1 Quantum-chemical calculations

Table S1:  $S_1(v=0) \leftarrow S_0(v=0)$  transition energy of **BPEA** in the gas phase obtained from TD-DFT calculations with different functionals and the 6-31G(d,p) basis set.

| Functional          | Transition Energy / eV |
|---------------------|------------------------|
| B3LYP               | 2.26                   |
| CAM-B3LYP           | 2.59                   |
| CAM-B3LYP-D3BJ      | 2.58                   |
| PW6B95-B3           | 2.29                   |
| M06                 | 2.35                   |
| M06-2x              | 2.60                   |
| Experimental in CHX | 2.63                   |

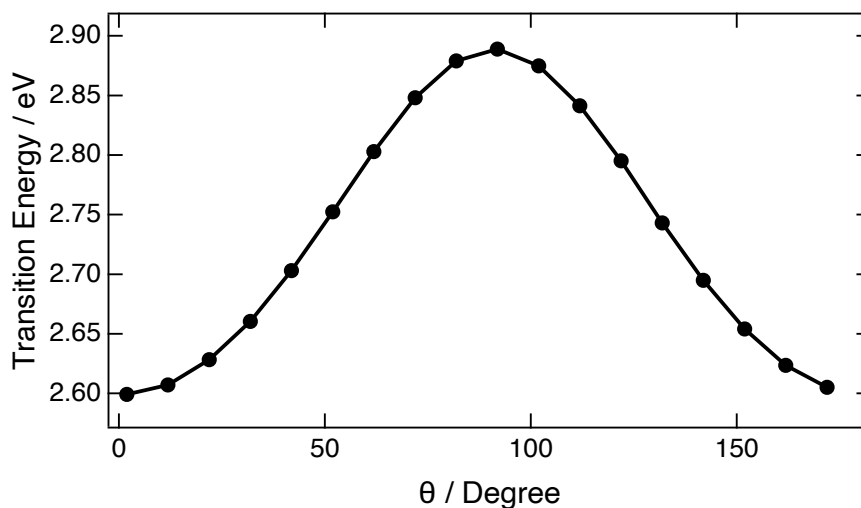

Figure S1: Calculated (M06-2x/6-31G(d,p))  $S_1 \leftarrow S_0$  transition energy of **BPEA** as a function of the torsion angle  $\theta$ .

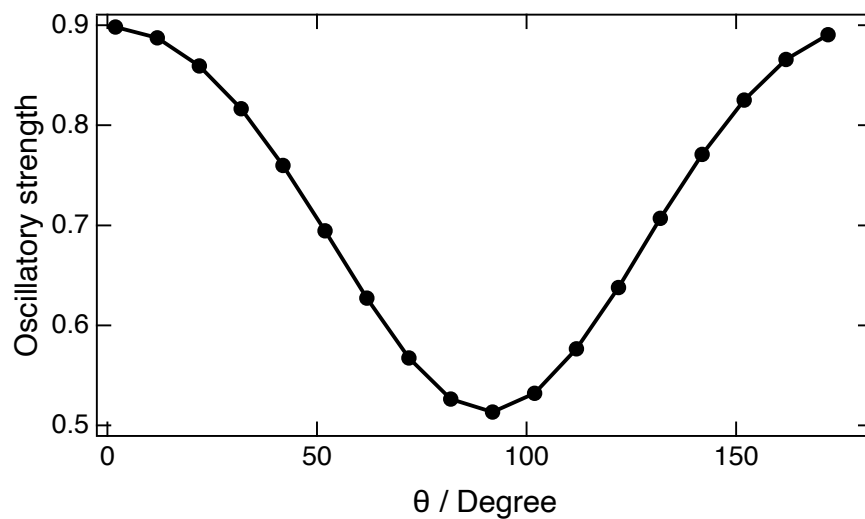

Figure S2: Calculated (M06-2x/6-31G(d,p)) oscillator strength of the  $S_1 \leftarrow S_0$  transition of **BPEA** as a function of the torsion angle  $\theta$ .

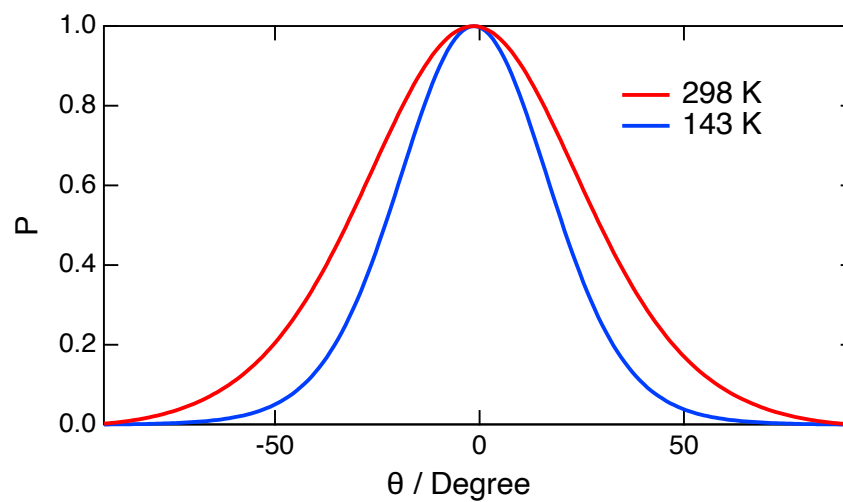

Figure S3: Boltzmann distribution of torsion angle,  $\theta$ , of **BPEA** in the ground state at two temperatures.

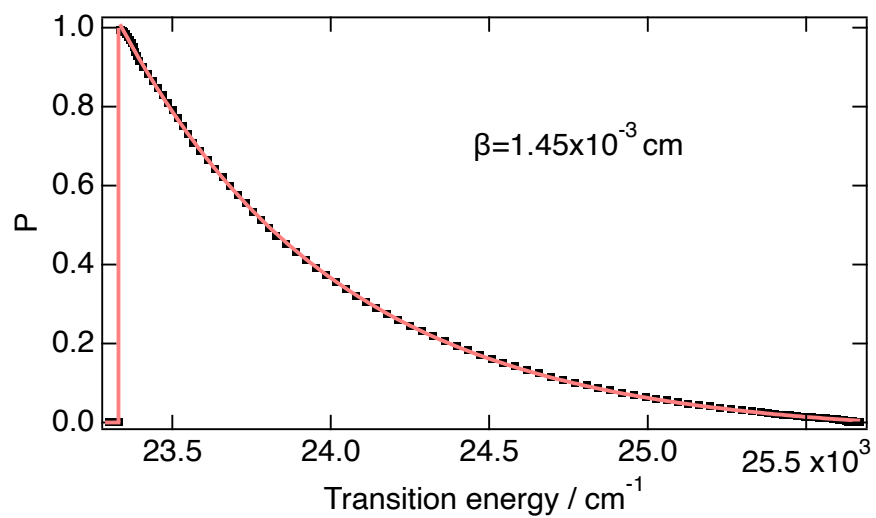

Figure S4: Thermal distribution of the  $S_1 \leftarrow S_0$  transition energy of **BPEA** at room temperature and best fit of eq.(1).

## S2 Stationary spectroscopy

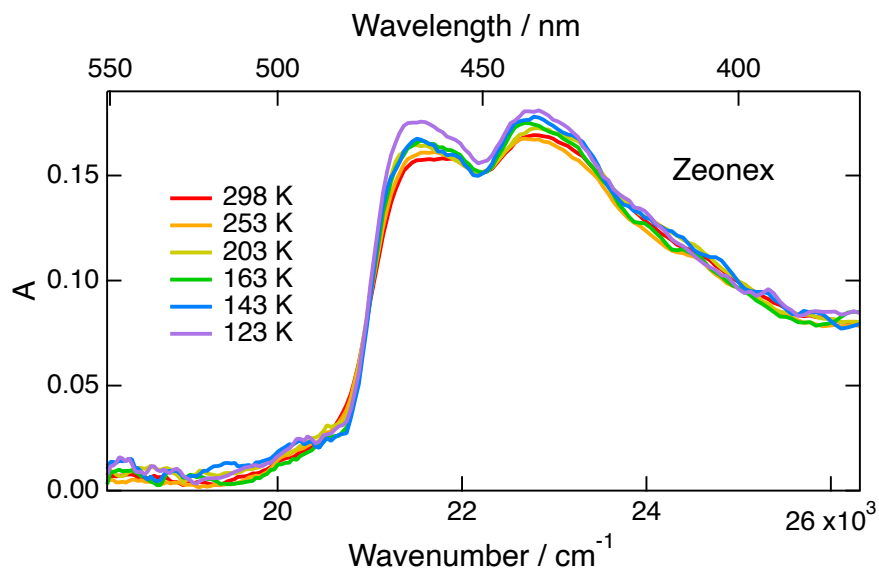

Figure S5: Temperature dependence of the stationary absorption spectrum of **BPEA** in Zeonex.

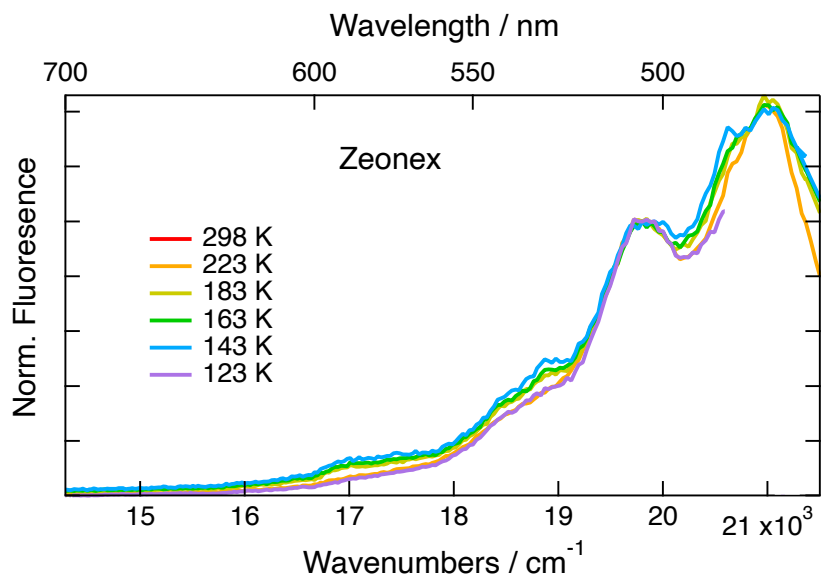

Figure S6: Temperature dependence of the fluorescence spectrum of **BPEA** in Zeonex upon 430 nm excitation. The 123 K spectrum was cut above 20,500 cm<sup>-1</sup> because of the presence of scattered light.

### S3 Femtosecond broadband fluorescence up-conversion spectroscopy (FLUPS)

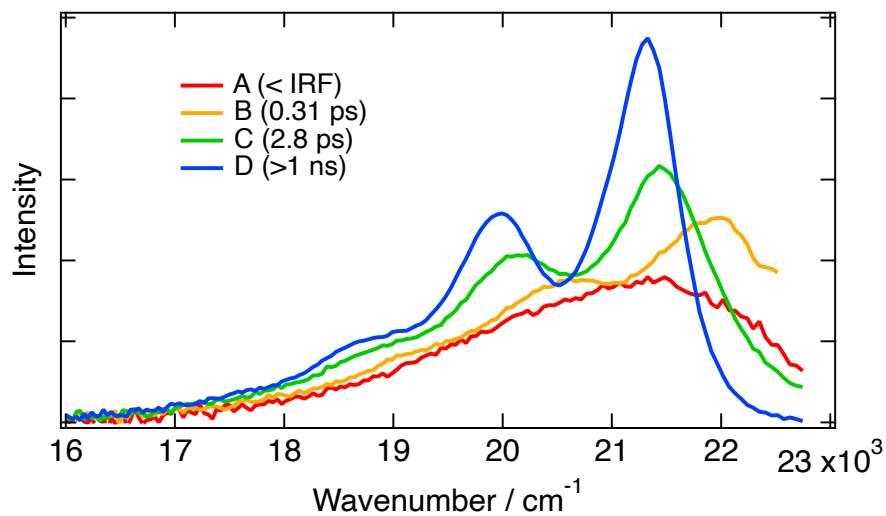

Figure S7: Evolution-associated spectra obtained from a global analysis of the FLUPS data measured with **BPEA** in cyclohexane upon 425 nm excitation assuming a  $A \rightarrow B \rightarrow C \rightarrow D \rightarrow$  scheme.



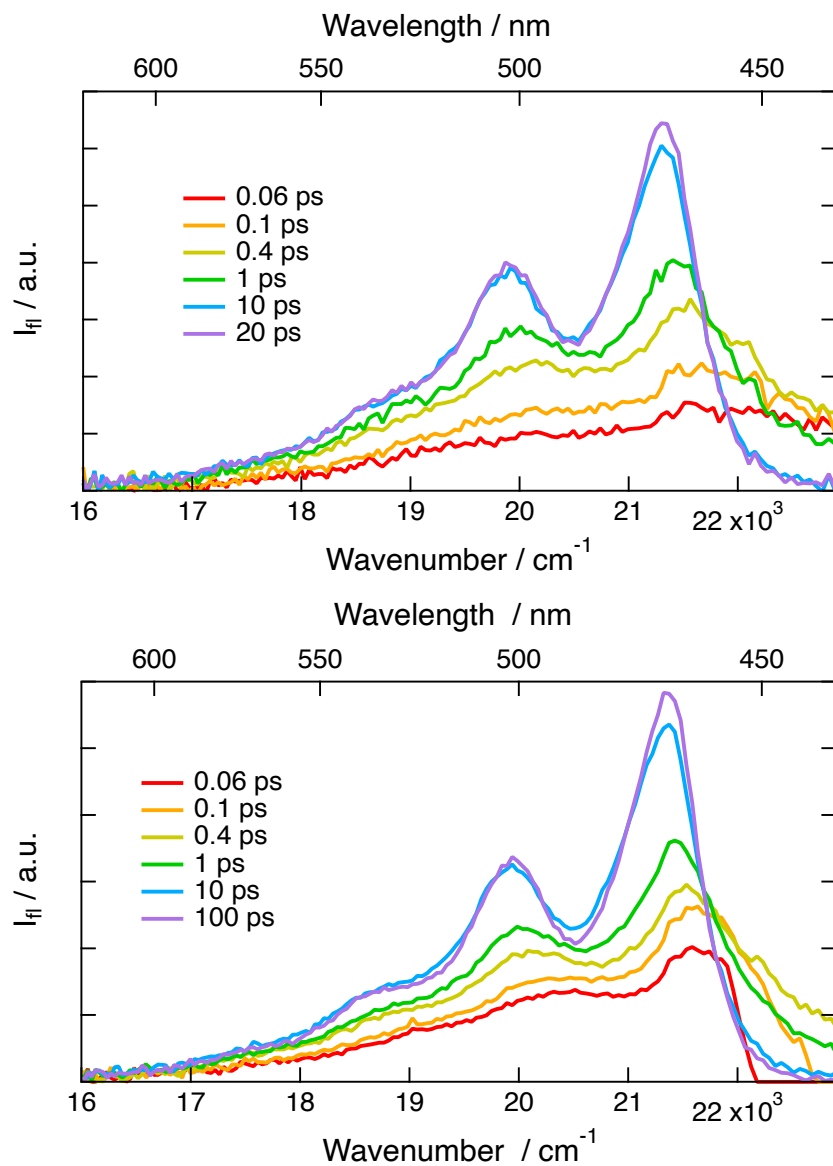

Figure S8: Transient fluorescence spectra recorded at various time delays after 375 (top) and 400 nm (bottom) excitation of BPEA in cyclohexane. The blue side of early spectra upon 400 nm excitation are cut due to the presence of Raman scattering.

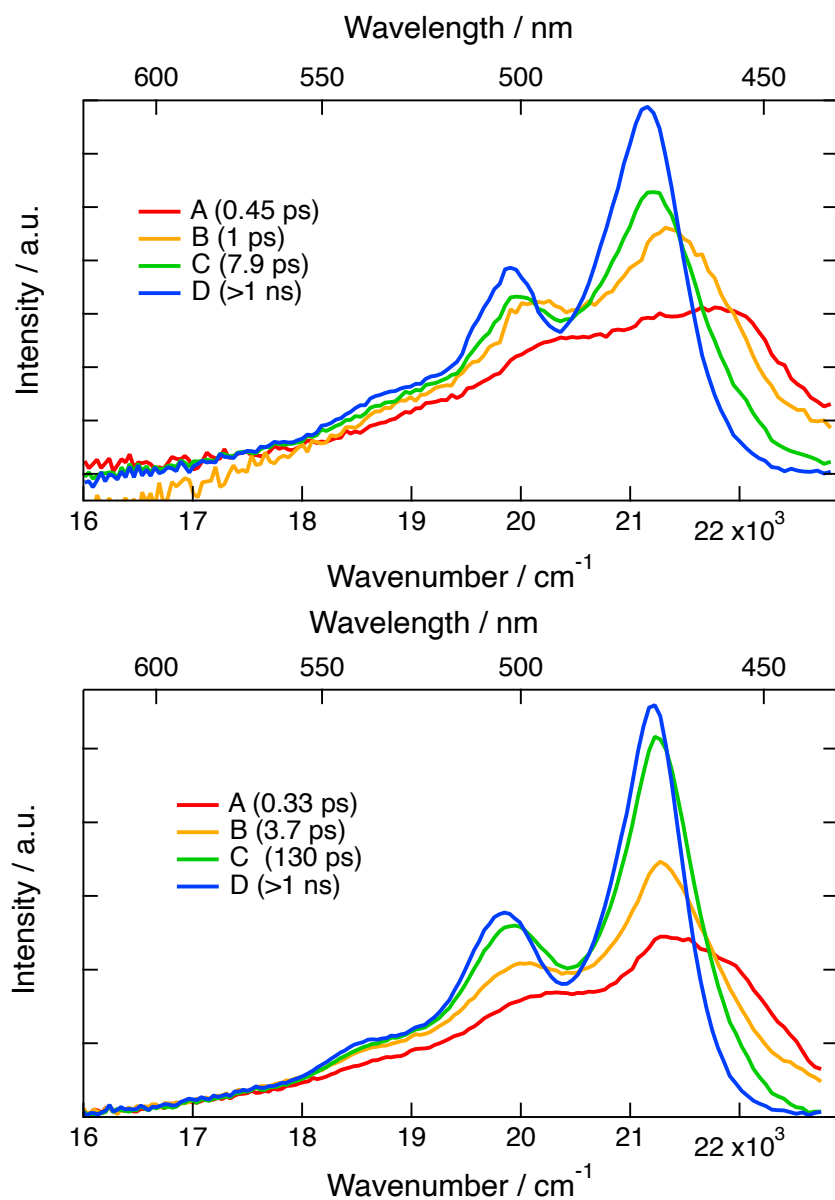

Figure S9: Evolution-associated spectra obtained from a global analysis of the FLUPS data measured with **BPEA** in decaline (top) and paraffin oil (bottom) upon 425 nm excitation assuming a  $A \rightarrow B \rightarrow C \rightarrow D \rightarrow$  scheme.

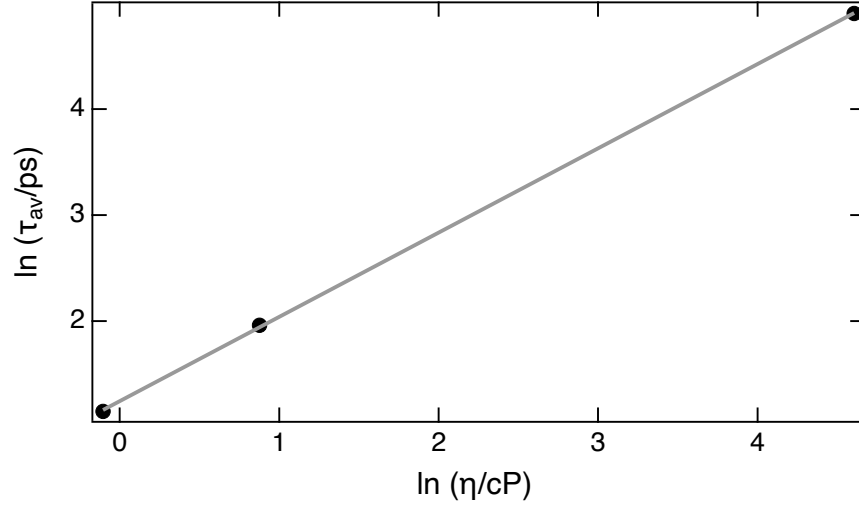

Figure S10: Amplitude-averaged time constant obtained from a (multi)-exponential analysis of the time evolution of  $\beta$  (Figure 6B) vs. viscosity and best fit of eq.(2).

Table S2: Time constants,  $\tau_i$ , and relative amplitudes,  $A_i$ , obtained from a multiexponential analysis of the rise of the fluorescence band area (Figure 5, main text). Error on  $\tau_i$ :  $\pm 10\%$ .

| Solvent      | $\tau_1$ / ps | $A_1$ | $\tau_2$ / ps | $A_2$ | $\tau_3$ / ps     | $A_3$ |
|--------------|---------------|-------|---------------|-------|-------------------|-------|
| cyclohexane  | 0.12          | -0.68 | 0.67          | -0.22 | 11.9 <sup>a</sup> | -0.1  |
| decalone     | 0.10          | -0.65 | 0.31          | -0.15 | 3.3               | -0.20 |
| paraffin oil | 0.12          | -0.66 | 0.65          | -0.17 | 120               | -0.17 |

a) this component is assigned to vibrational cooling and not to planarisation.

## S4 Electronic transient absorption spectroscopy (TA)

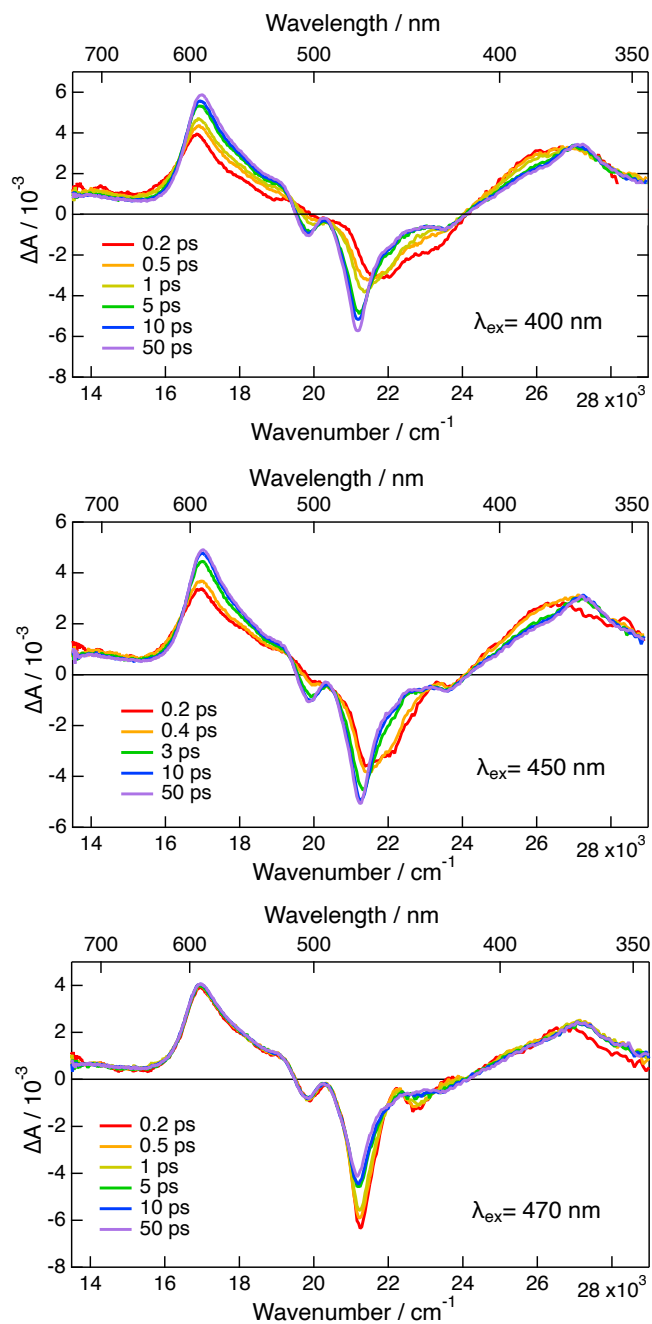

Figure S11: Transient electronic absorption spectra recorded at various time delays after 400, 450, and 470 nm excitation of **BPEA** in decaline.

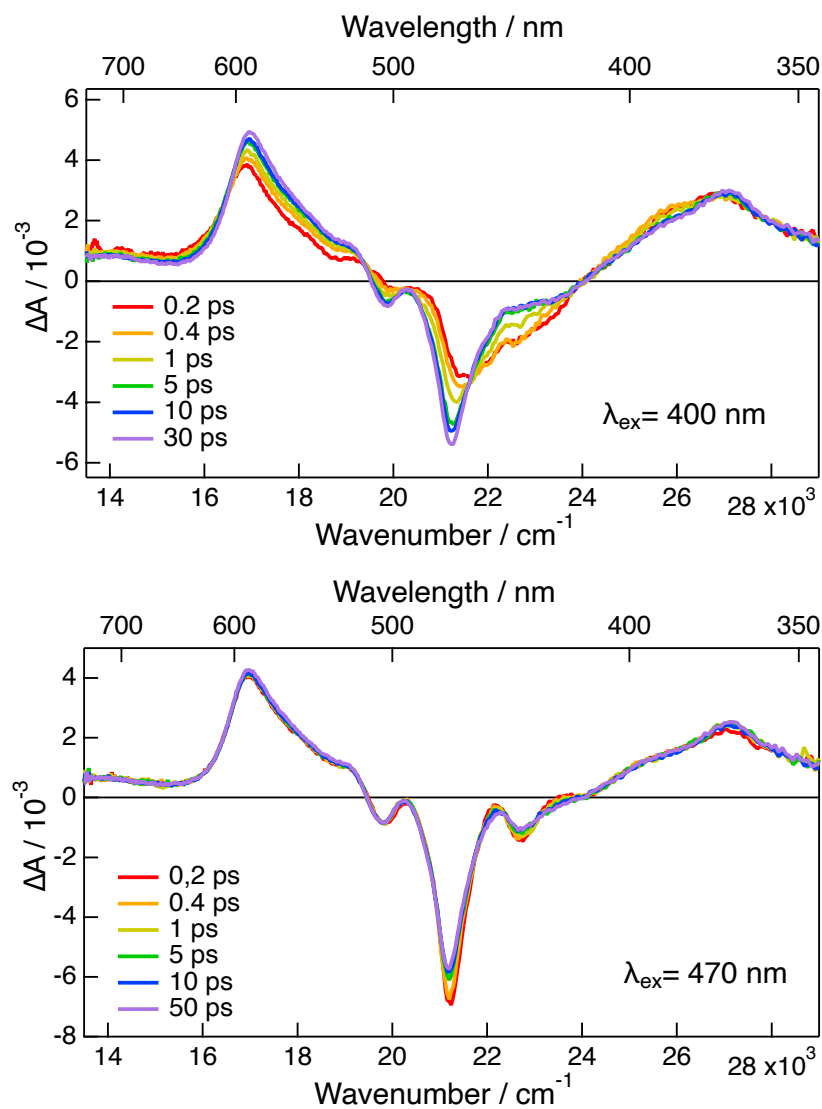

Figure S12: Transient electronic absorption spectra recorded at various time delays after 400 nm (top), and 470 nm (bottom) excitation of **BPEA** in paraffin oil.

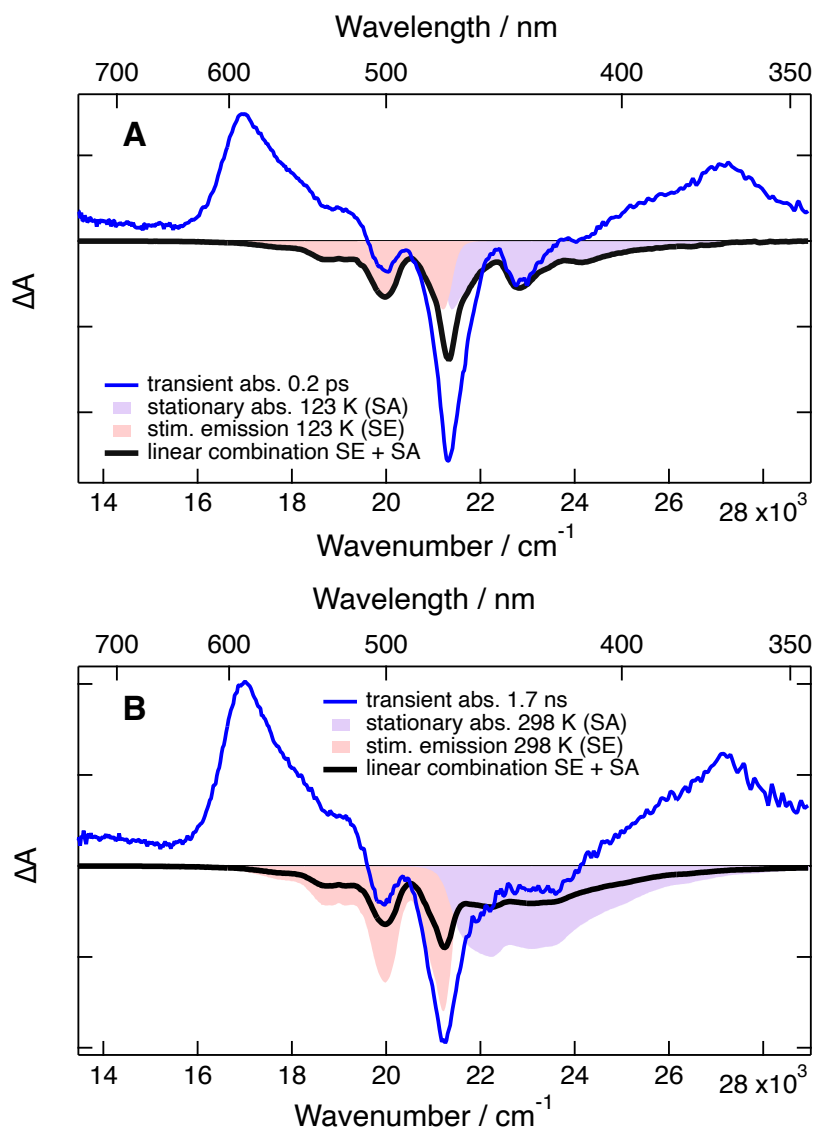

Figure S13: Transient electronic absorption spectra recorded at early (A) and late time (B) after 470 nm excitation of **BPEA** in cyclohexane, negative stationary absorption and stimulated emission spectra of **BPEA** in MTHF at 123 K (A) and cyclohexane at 298 K (B) and linear combinations of the absorption and stimulated emission spectra. The stimulated emission spectra were calculated by multiplying the spontaneous emission spectra by  $\lambda^4$ , where  $\lambda$  is the wavelength.[1]

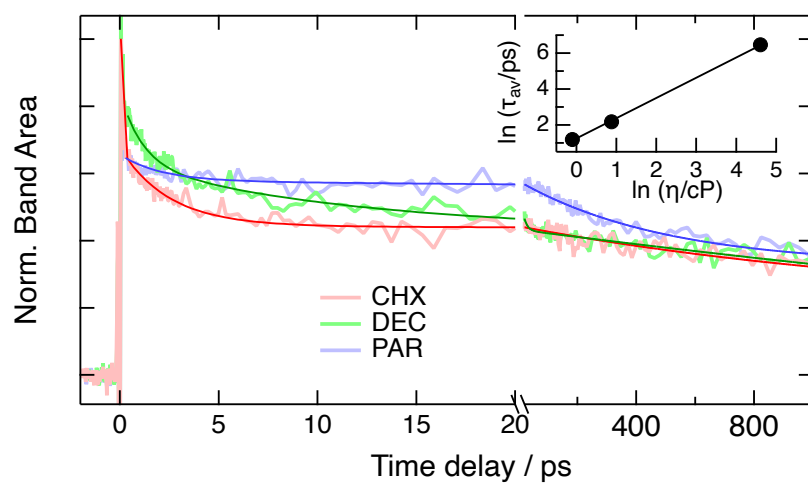

Figure S14: Time profiles of the 440 nm transient band area measured upon 470 nm excitation of **BPEA** and best biexponential fits. The initial spike is associated with vibrational coherence and was not included in the fit. Inset: amplitude-averaged time constant vs. viscosity and best fit of eq.2. (CHX: cyclohexane; DEC: decaline; PAR: paraffin oil).

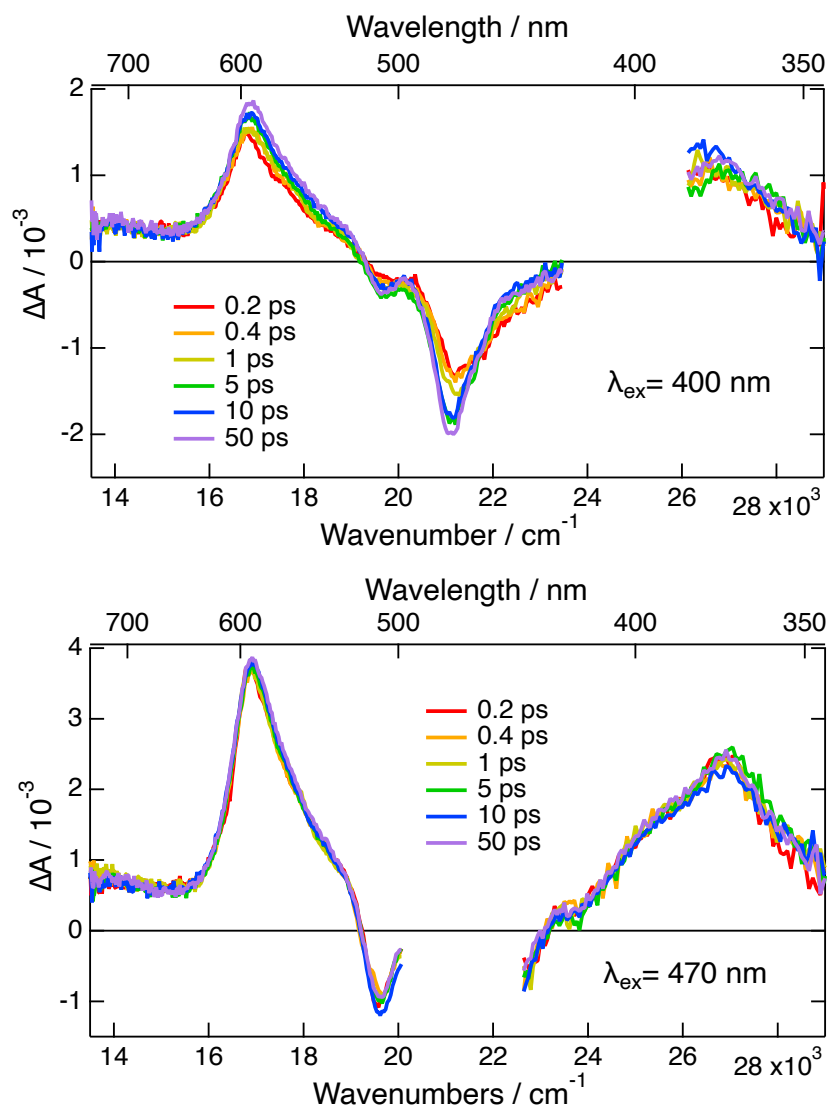

Figure S15: Transient electronic absorption spectra recorded upon 400 nm (top) and 470 nm (bottom) excitation of **BPEA** in Zeonex.



## References

- [1] A. V. Deshpande, A. Beidoun, A. Penzkofer and G. Wagenblast, *Chem. Phys.*, 1990, **142**, 123–131.
